# Supplementary material for: Dinocyst and acritarch biostratigraphy of the Late Pliocene to Early Pleistocene at Integrated Ocean Drilling Program Site U1307 in the Labrador Sea
Source: Copernicus journal article supplement (doi:10.5194/jm-39-41-2020), 2020-03-19
Supplement: Supplementary file 1 [file jm-39-41-2020-supplement.zip]

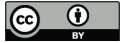

## *Supplement of*

# **Dinocyst and acritarch biostratigraphy of the Late Pliocene to Early Pleistocene at Integrated Ocean Drilling Program Site U1307 in the Labrador Sea**

**Aurélie Marcelle Renée Aubry et al.**

*Correspondence to:* Aurélie Marcelle Renée Aubry ([aurelieaubry@gmail.com](mailto:aurelieaubry@gmail.com))

- [jm-39-41-2020-supplement-title-page.pdf](#)
- [Data S1.docx](#)
- [Data S2.xlsx](#)
- [Plate S1.tif](#)
- [Plate S2.tif](#)
- [Supplementary plate captions.docx](#)

The copyright of individual parts of the supplement might differ from the CC BY 4.0 License.
